# Supplementary material
Source: PubMed Central journal article supplement (PMC8809885)

Figure 3d

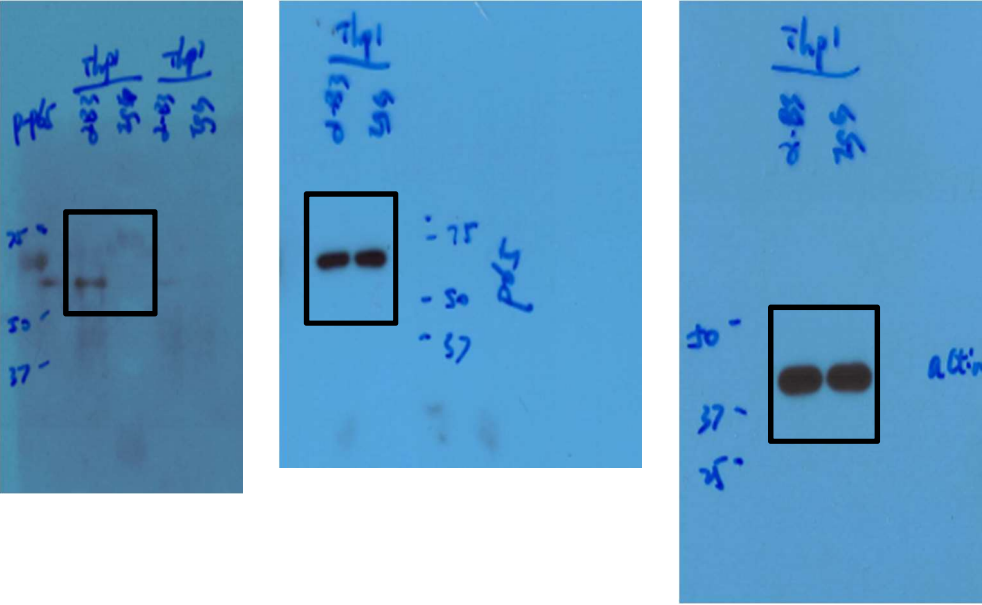

Supplement: NIHMS1735692-supplement-Unmodified_Gels_and_blot_for_Fig_3.pdf [file NIHMS1735692-supplement-Unmodified_Gels_and_blot_for_Fig_3.pdf]

Figure 4a

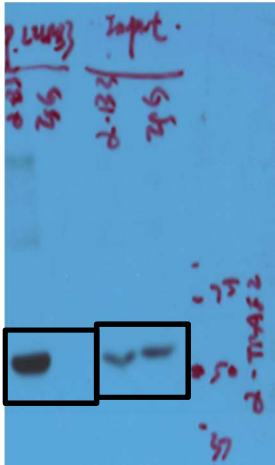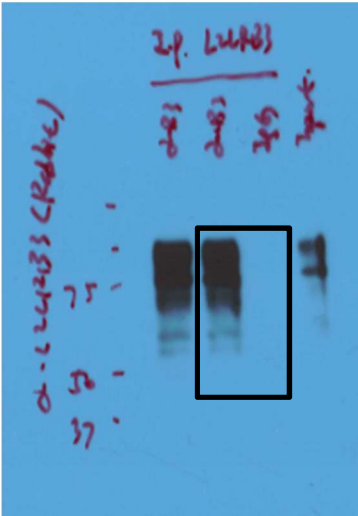

Figure 4b

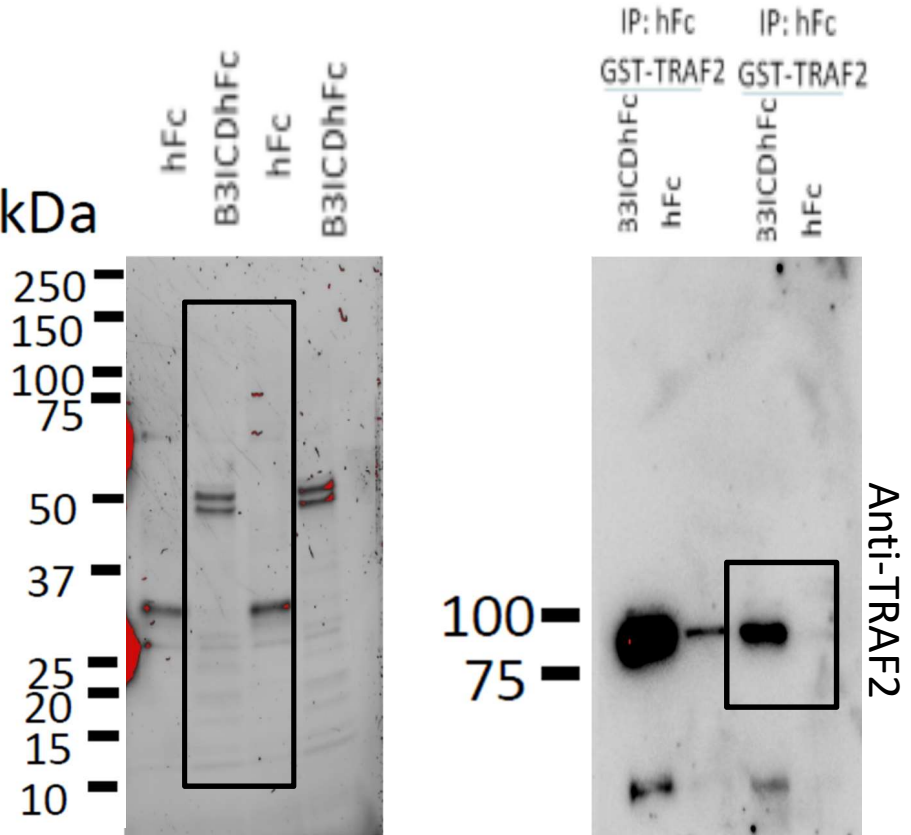

Figure 4c

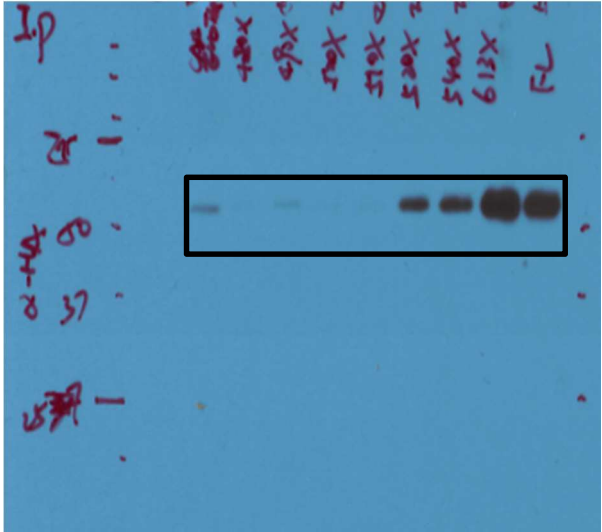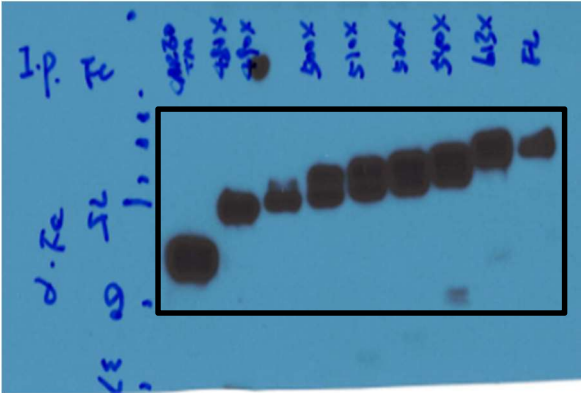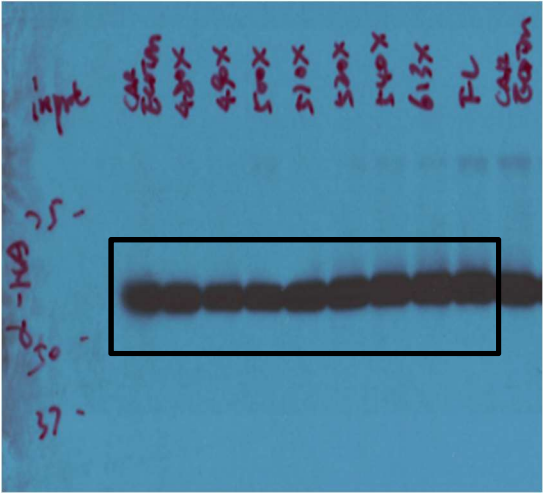

Figure 4d

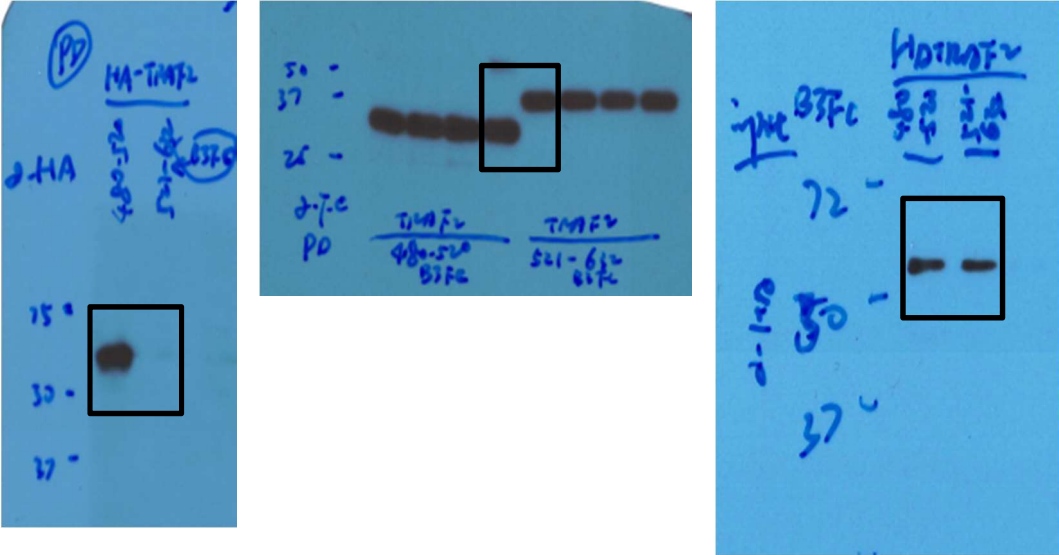

Figure 4e

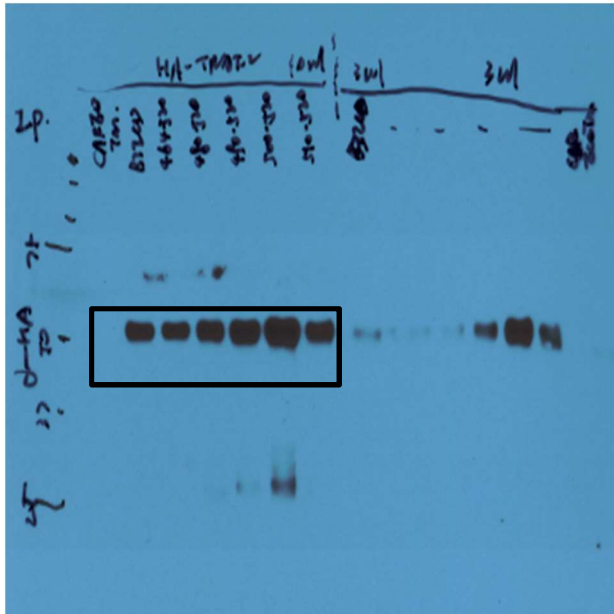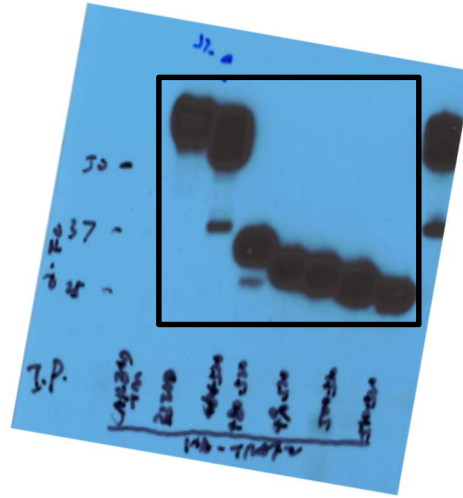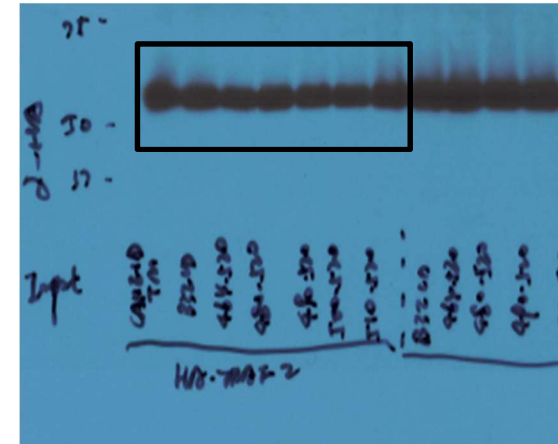

Figure 4f

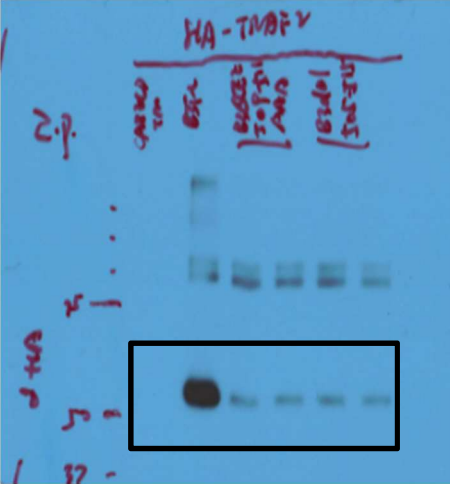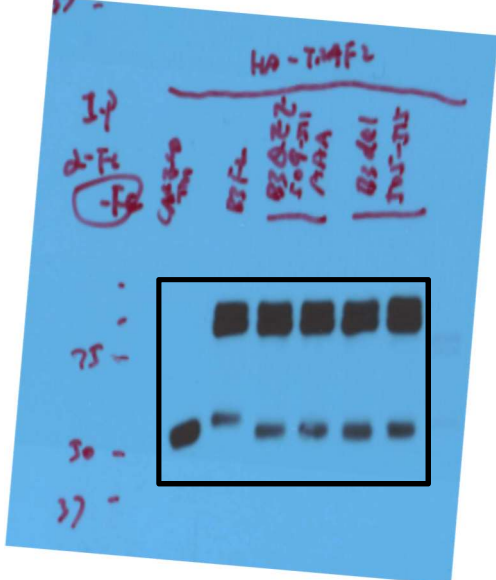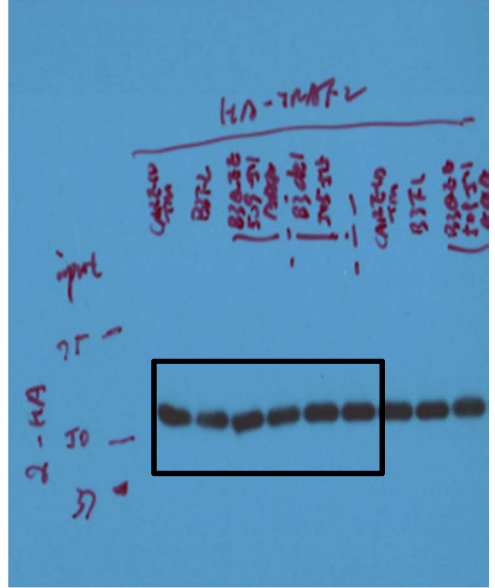

Figure 4i

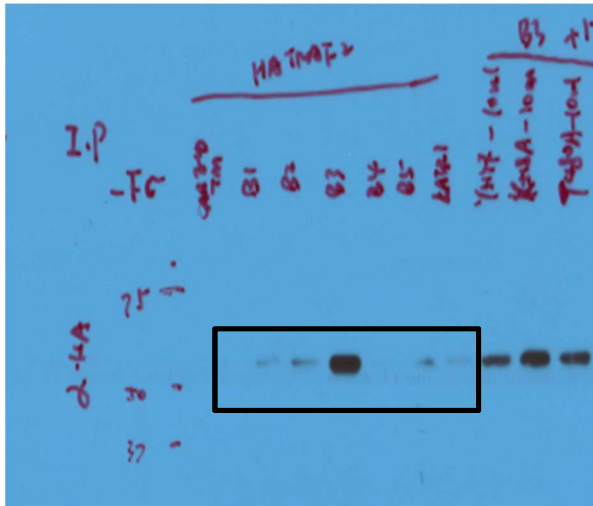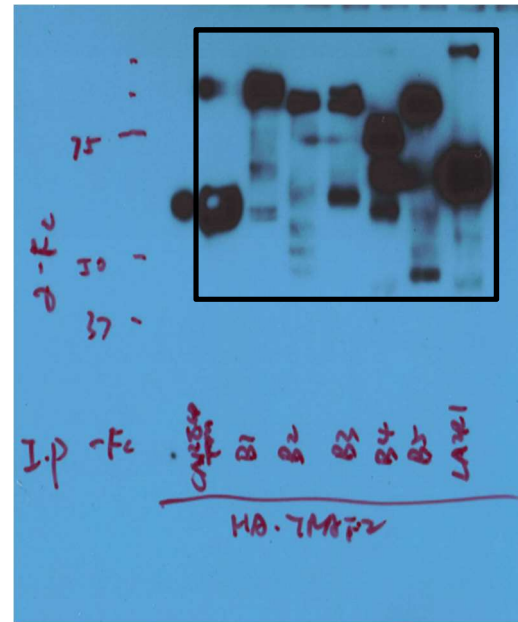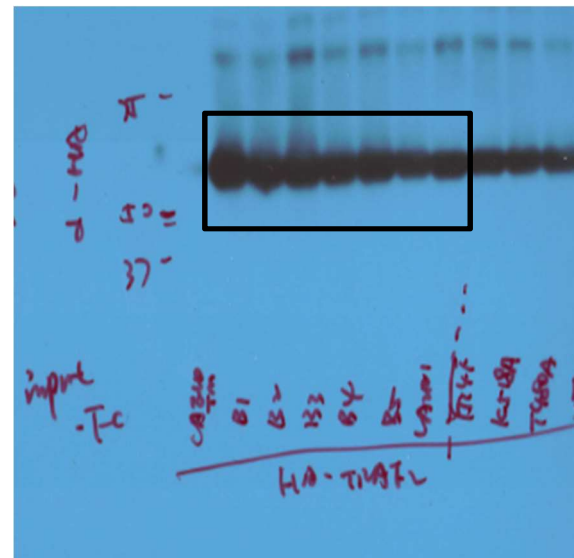

Figure 4j

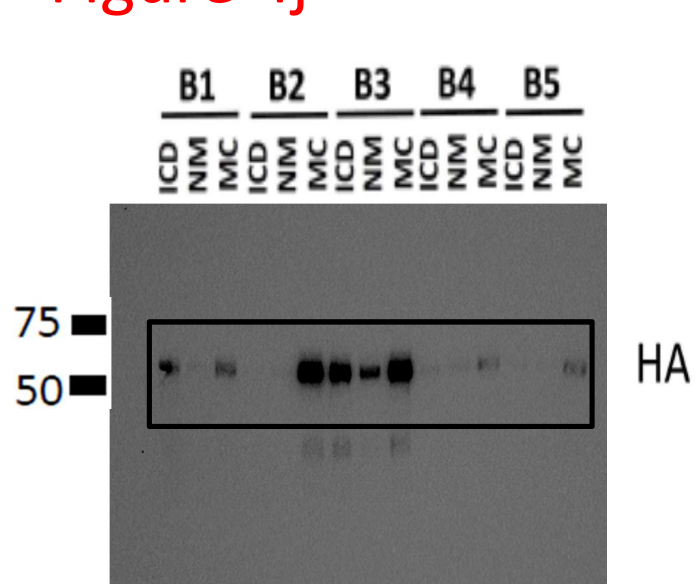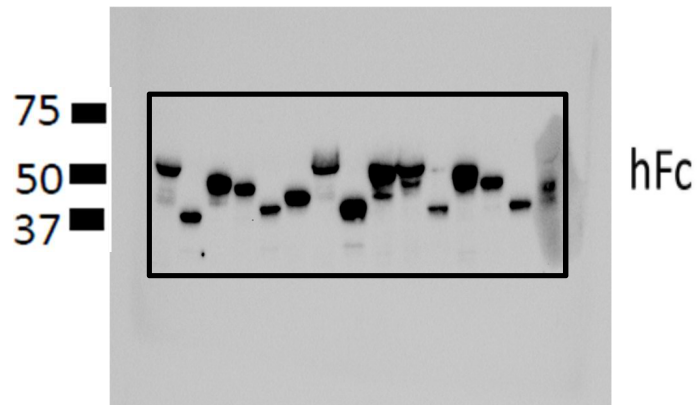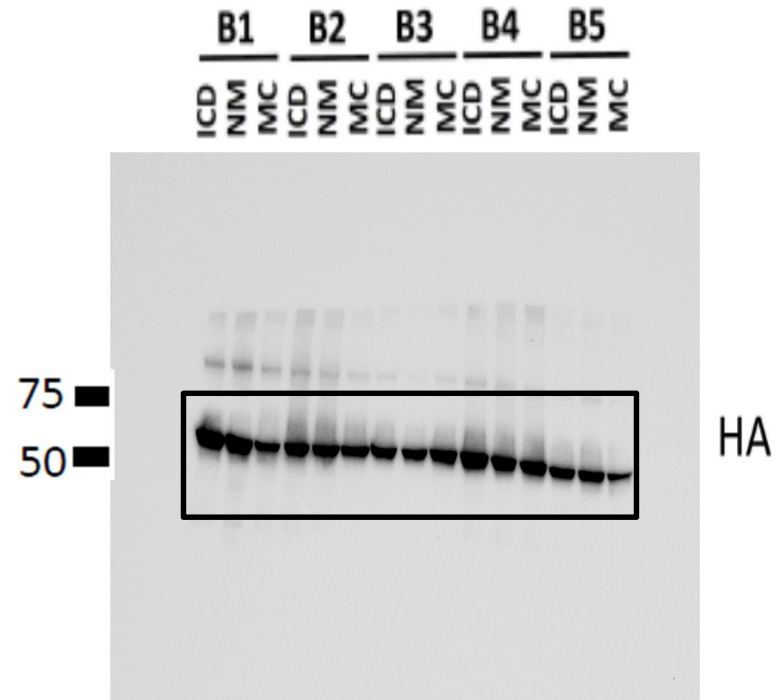



Figure 4k

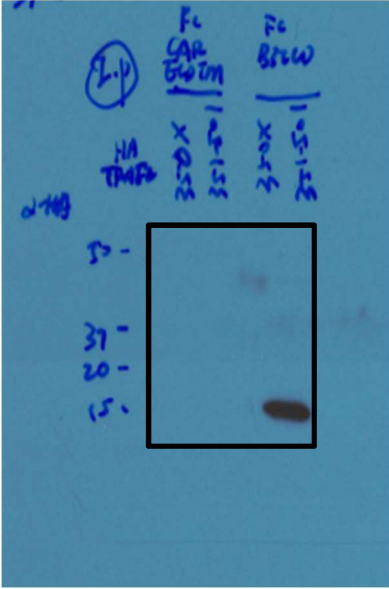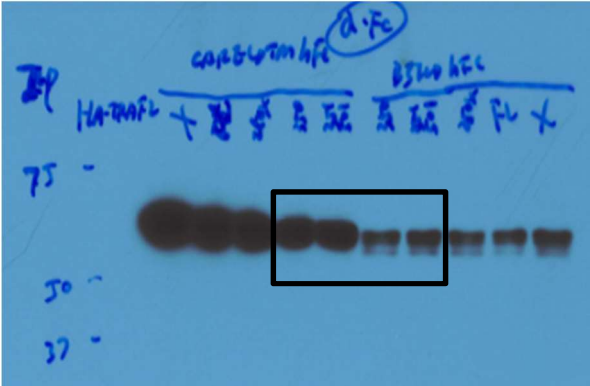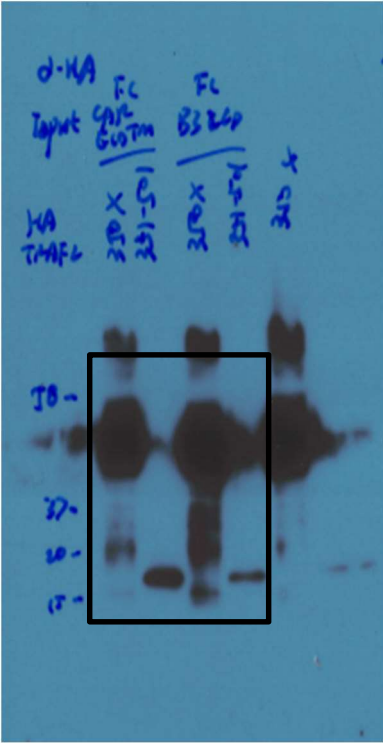

Supplement: NIHMS1735692-supplement-Unmodified_Gels_and_blot_for_Fig_4.pdf [file NIHMS1735692-supplement-Unmodified_Gels_and_blot_for_Fig_4.pdf]

Figure 5b

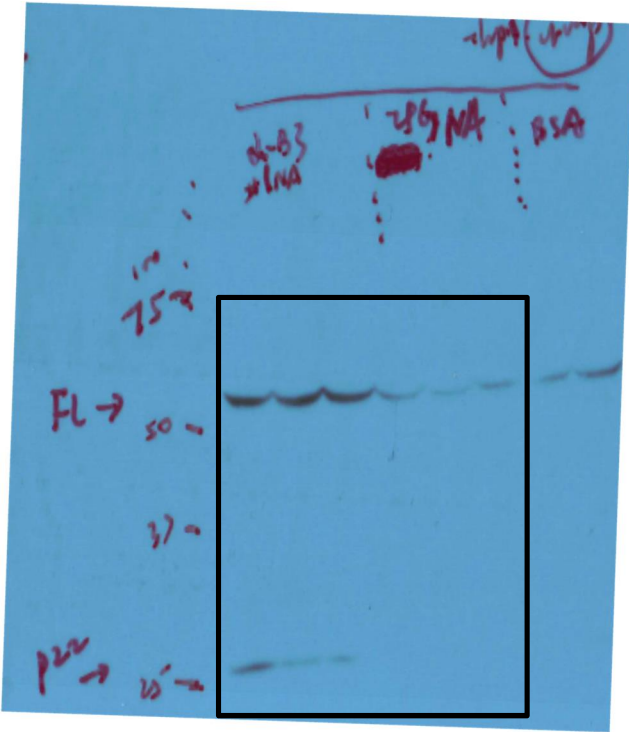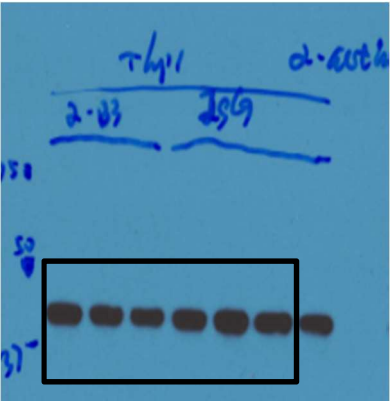

Figure 5e

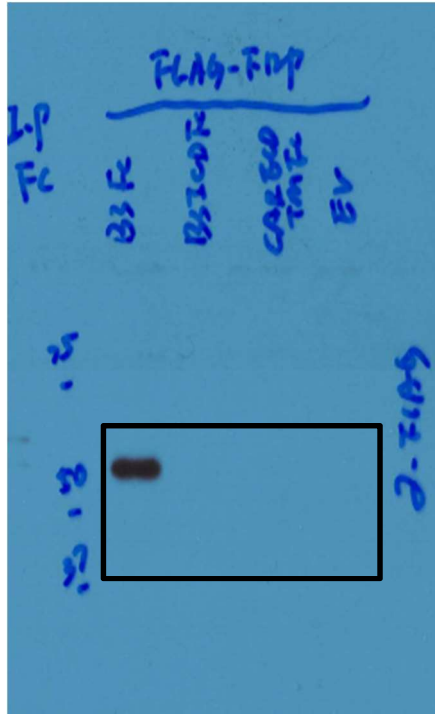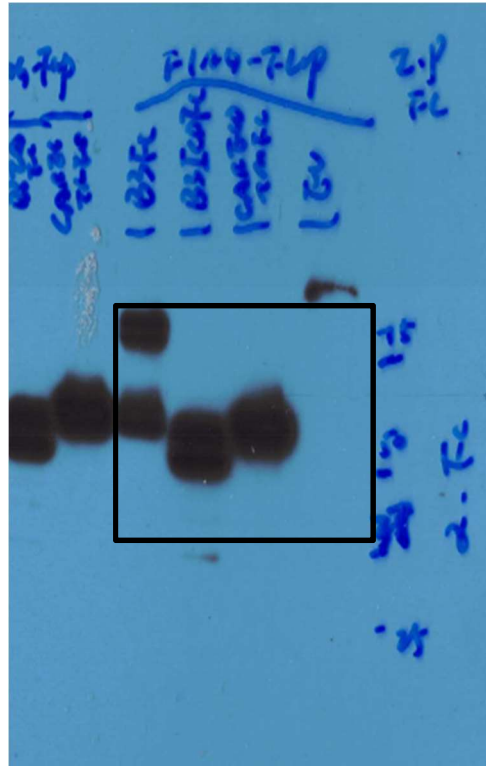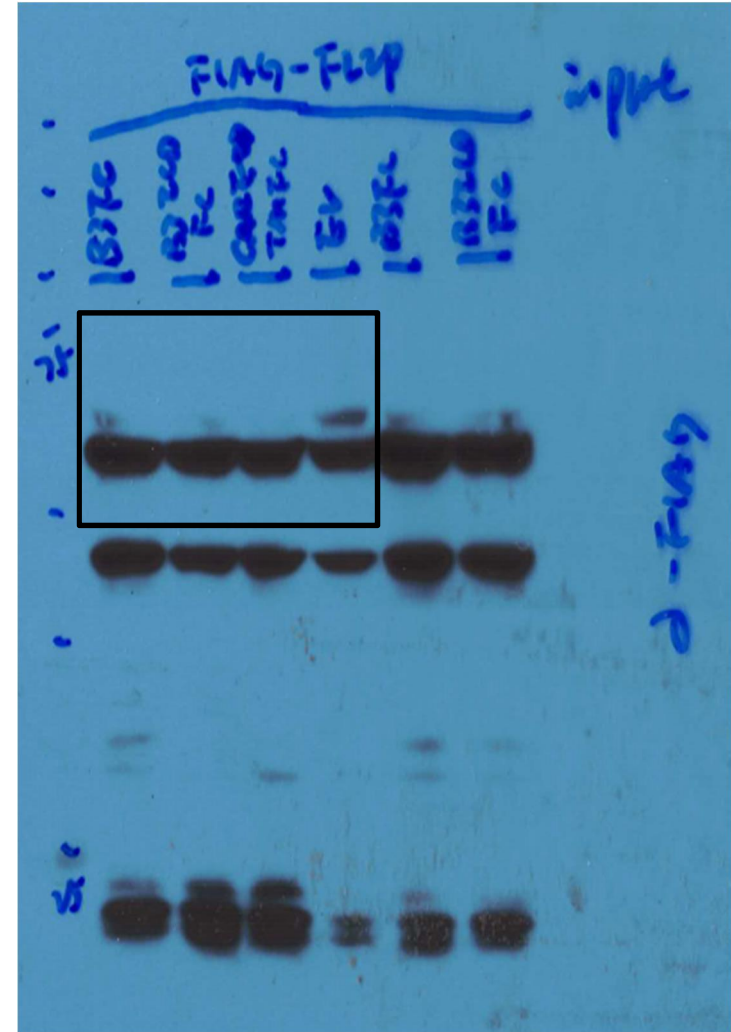

Figure 5f

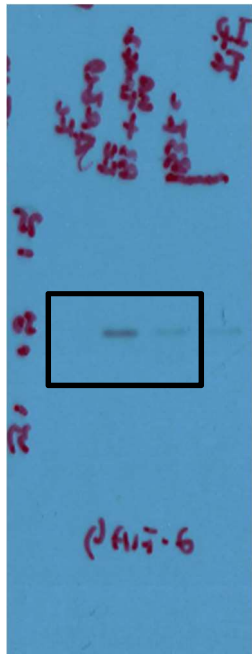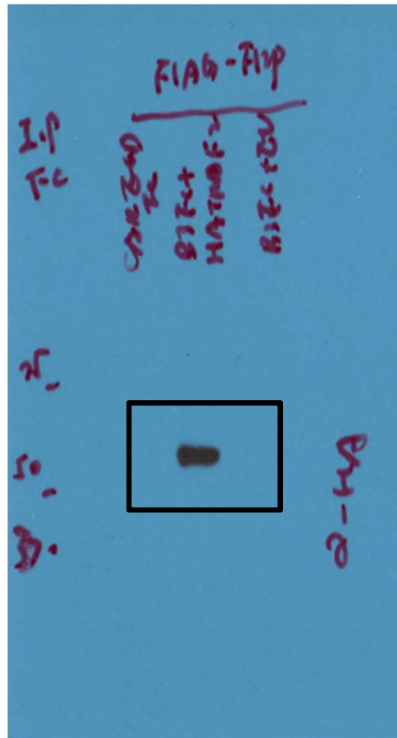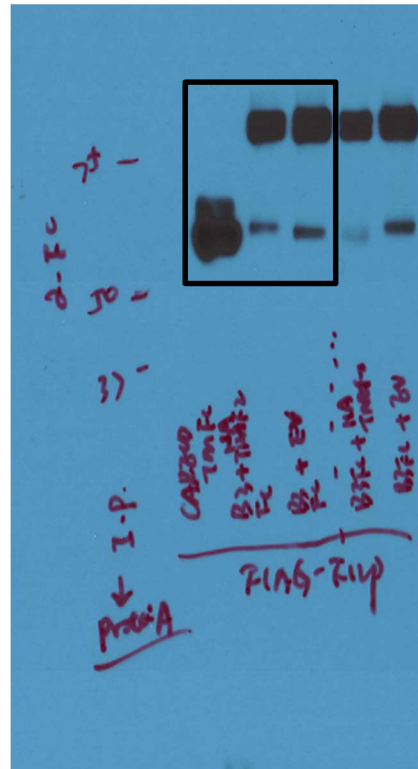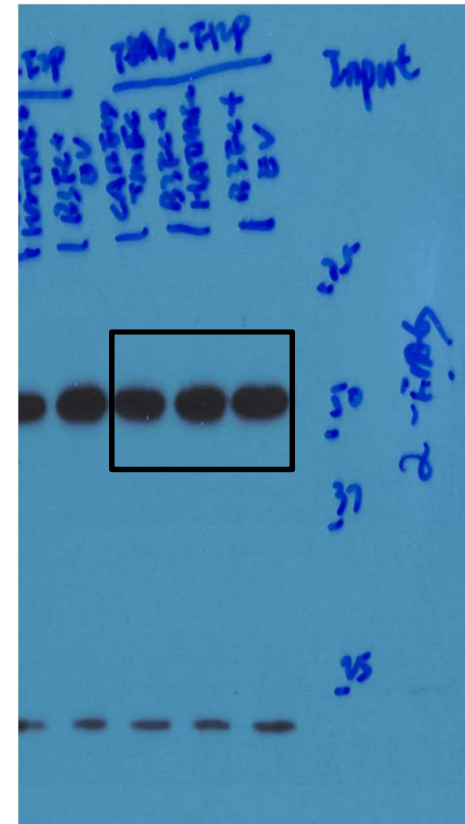

Supplement: NIHMS1735692-supplement-Unmodified_Gels_and_blot_for_Fig_5.pdf [file NIHMS1735692-supplement-Unmodified_Gels_and_blot_for_Fig_5.pdf]

Figure 6b

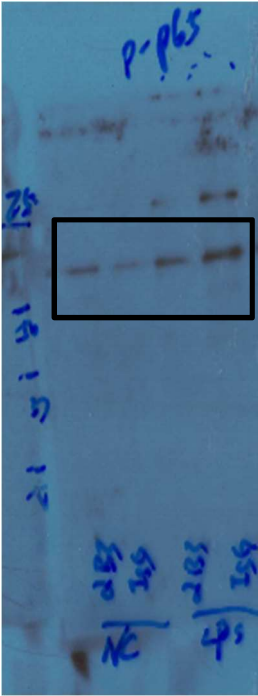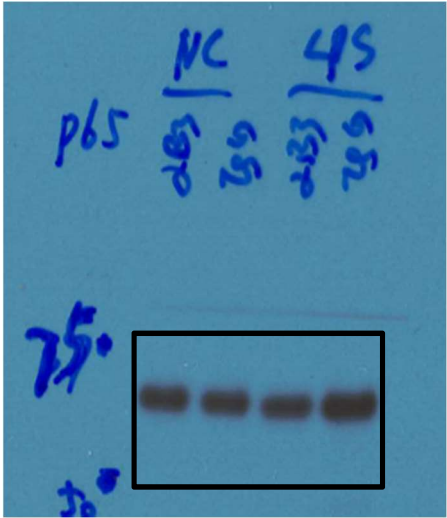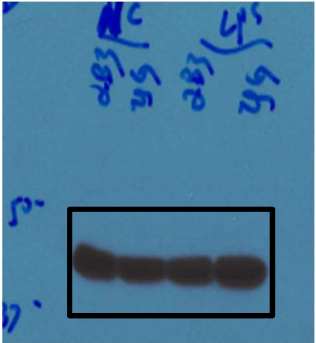

Figure 6c

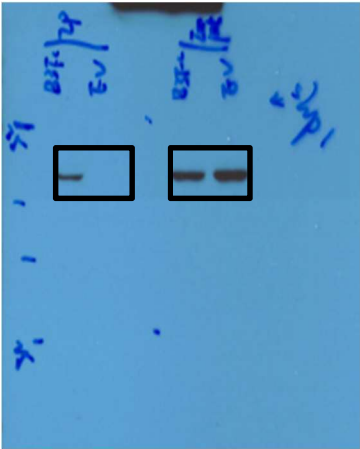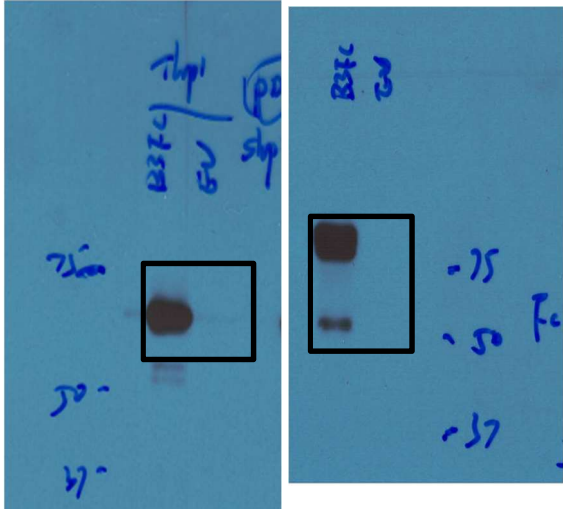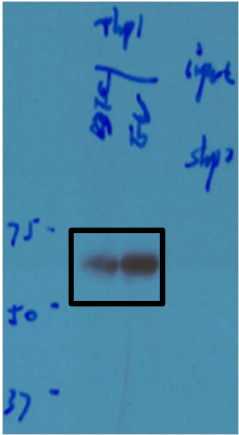

Figure 6d

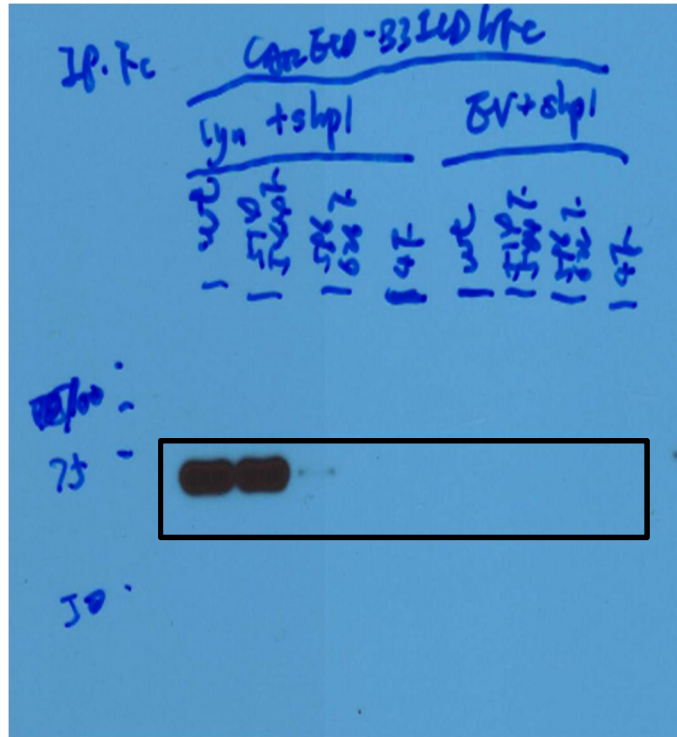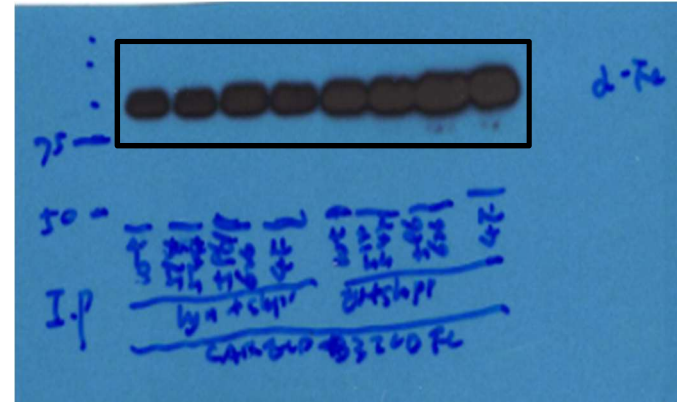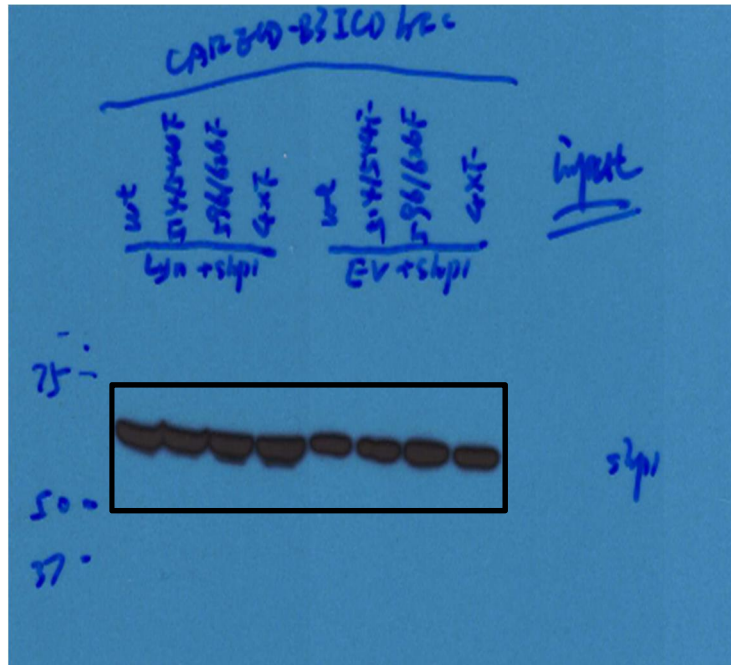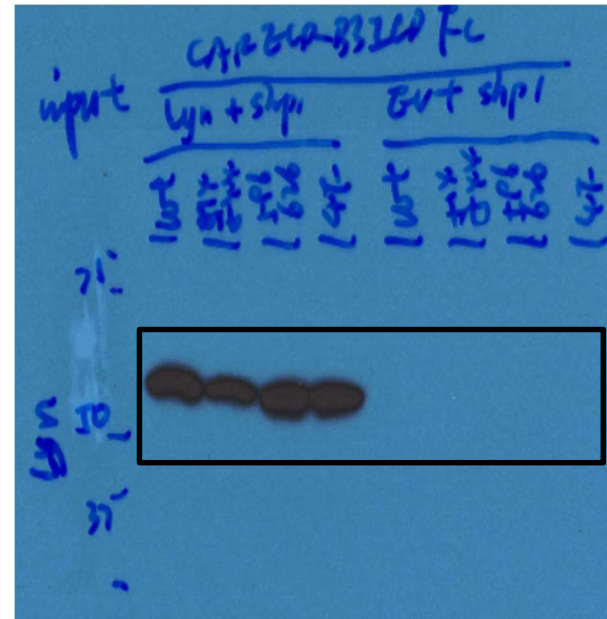

Figure 6i

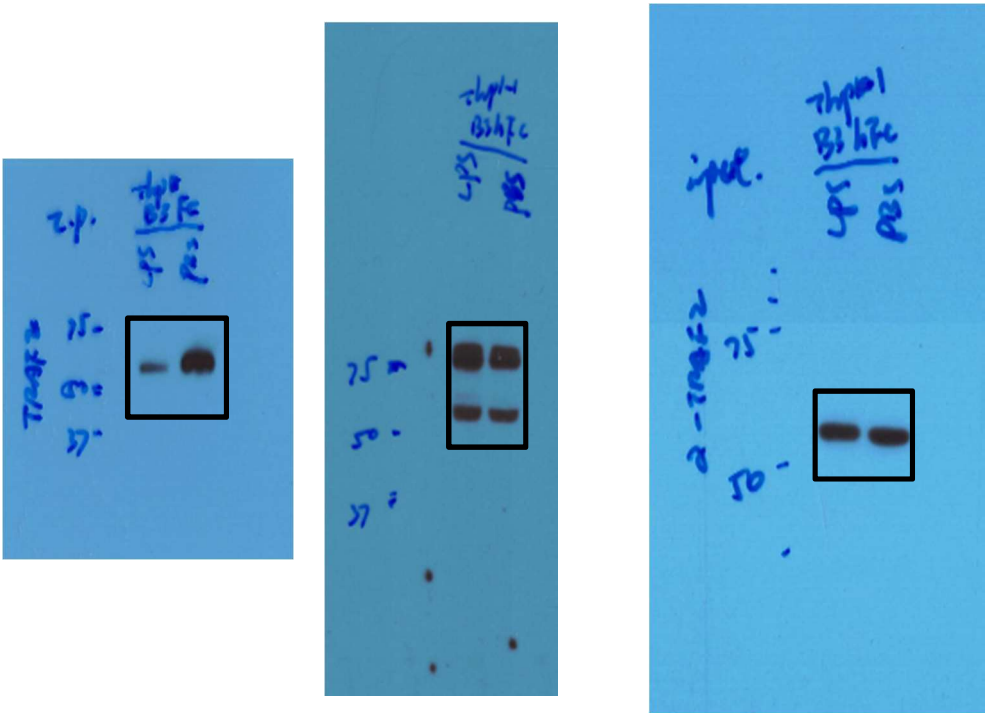

Figure 6j

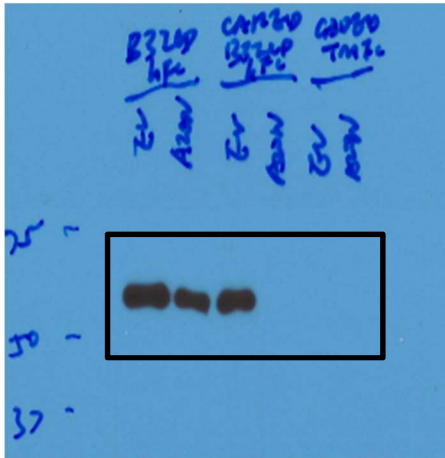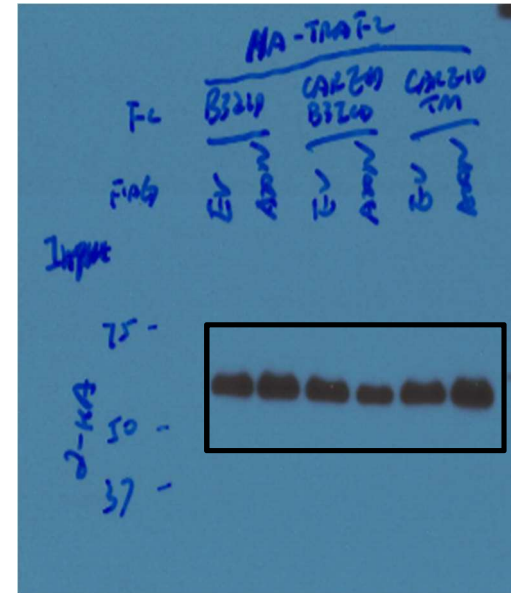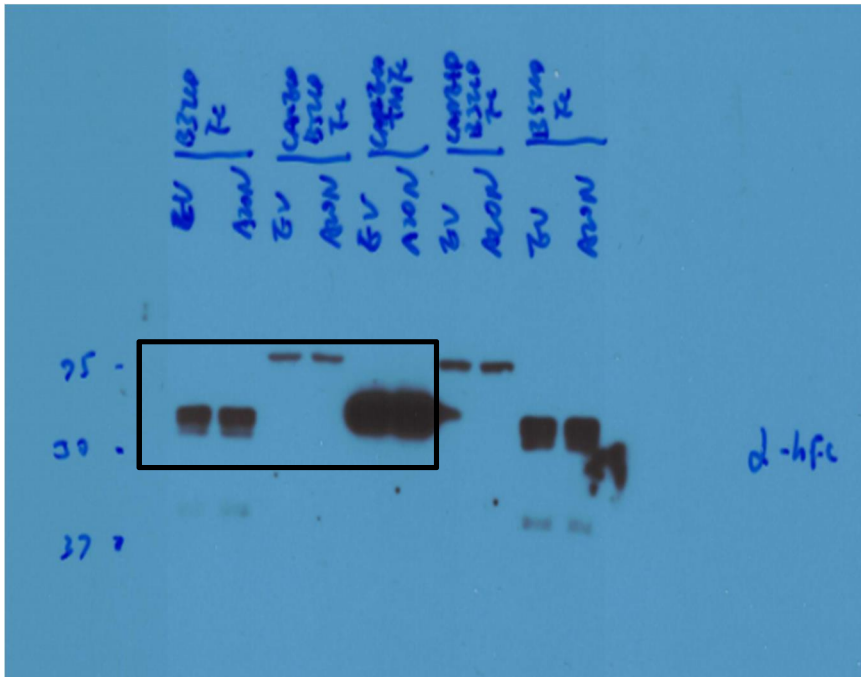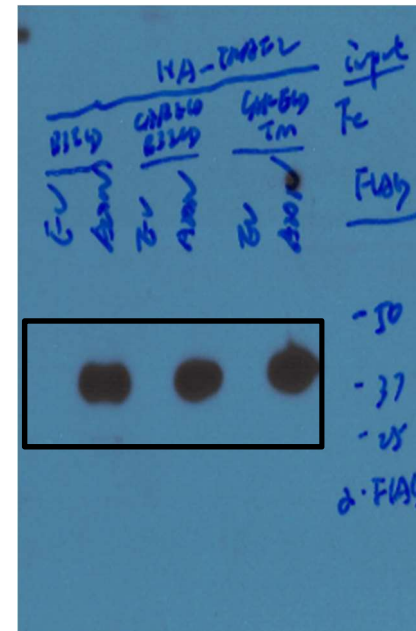

Figure 6m

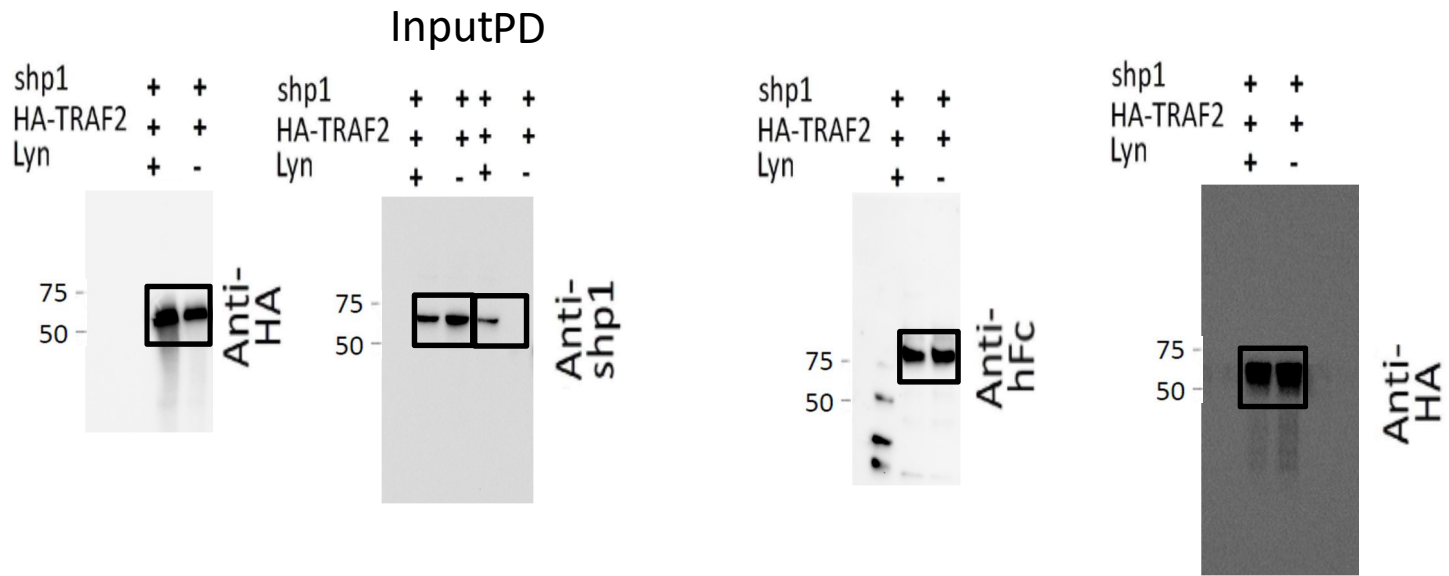

Figure 6n

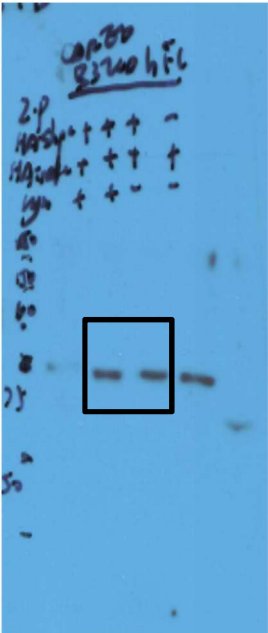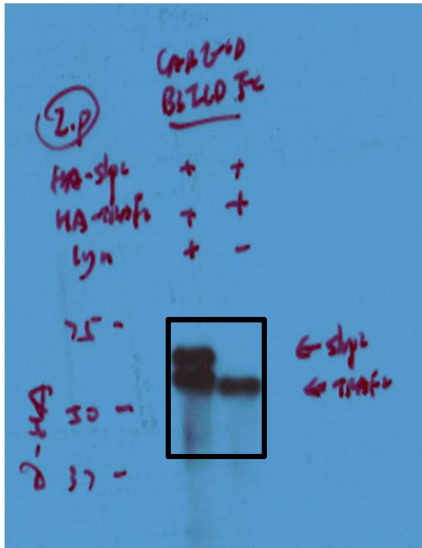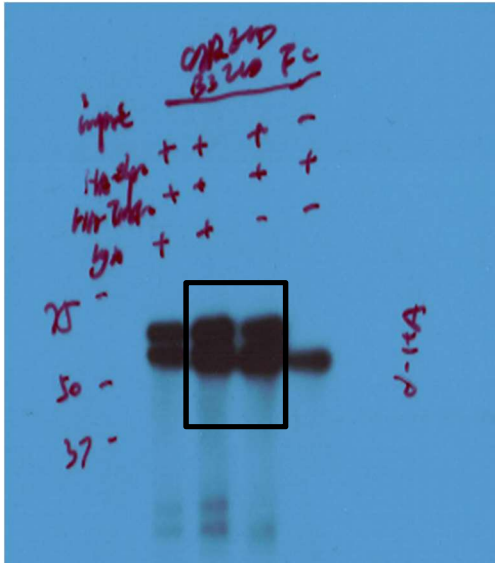

Supplement: NIHMS1735692-supplement-Unmodified_Gels_and_blot_for_Fig_6.pdf [file NIHMS1735692-supplement-Unmodified_Gels_and_blot_for_Fig_6.pdf]

# Ex Figure 4c

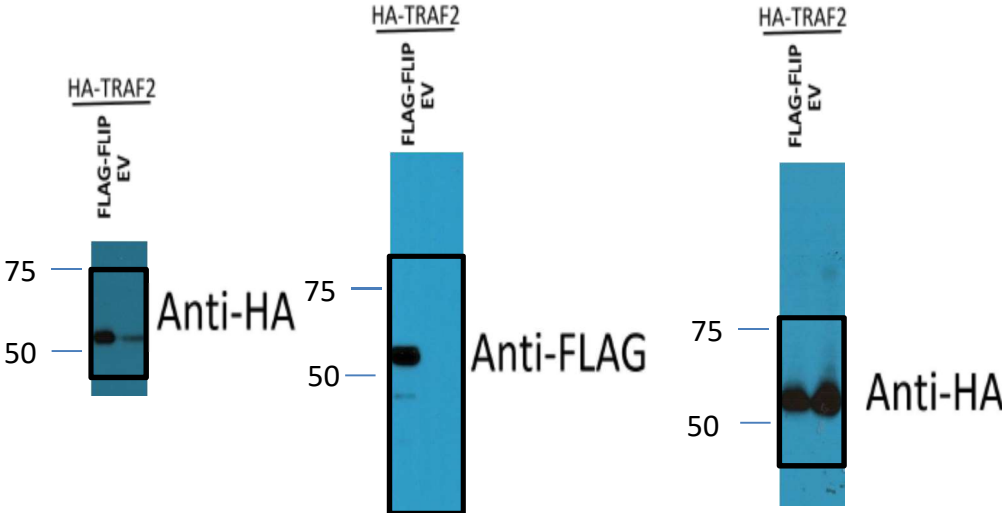

# Ex Figure 4f

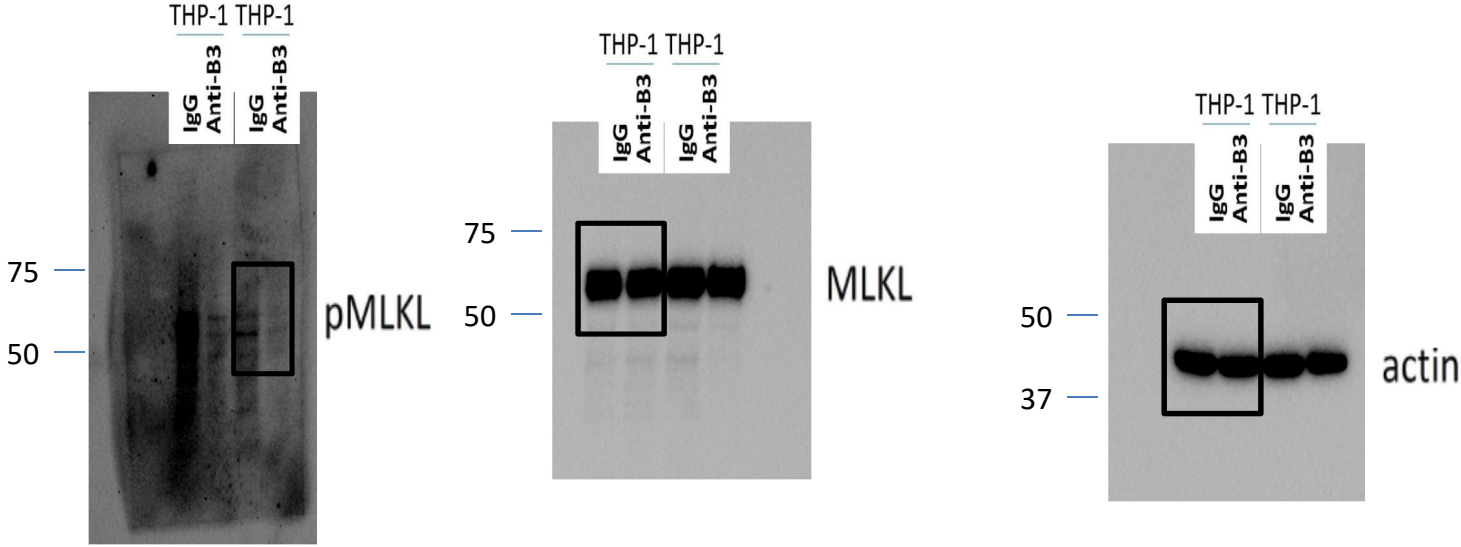

Supplement: NIHMS1735692-supplement-Unmodified_Gels_and_blot_for_extended_data_Fig_4.pdf [file NIHMS1735692-supplement-Unmodified_Gels_and_blot_for_extended_data_Fig_4.pdf]
